# Supplementary material
Source: PubMed Central journal article supplement (PMC3119611)
Supplement: supp_mcr099_mcr099supp.pdf [file supp_mcr099_mcr099supp.pdf]

## SUPPLEMENTARY DATA

TABLE S1. Genetic analysis of diploid parental genotypes with SSR markers

| SSR marker              | T. Ciaculli | W. Leaf | Anana   | Duncan  | Star Ruby | Sweet orange <sup>a</sup> | Fairchild | Kara    | Kinnow  | Page    | Sunburst | Mapo    | Minneola | Murcott | Ortanique | Nadorcott |
|-------------------------|-------------|---------|---------|---------|-----------|---------------------------|-----------|---------|---------|---------|----------|---------|----------|---------|-----------|-----------|
| TAA 15                  | 191 204     | 191 204 | 176 188 | 164 188 | 164 188   | 164 188                   | 188 191   | 185 188 | 204 204 | 188 191 | 188 191  | 188 191 | 188 188  | 188 204 | 164 204   | 188 204   |
| mCrCIR02D09             | 236 238     | 236 238 | 230 236 | 226 230 | 226 230   | 230 230                   | 230 230   | 230 236 | 230 238 | 230 238 | 230 230  | 230 236 | 230 230  | 230 230 | 228 230   | 228 230   |
| mCrCIR04H06             | 190 196     | 190 196 | 190 196 | 184 184 | 184 184   | 184 190                   | 190 190   | 188 190 | 188 196 | 184 196 | 184 196  | 184 190 | 184 190  | 188 188 | 184 190   | 188 190   |
| CAC 15                  | 168 177     | 168 177 | 177 177 | 177 180 | 177 180   | 177 177                   | 177 180   | 177 177 | 177 177 | 177 180 | 177 180  | 168 177 | 177 180  | 177 177 | 177 177   | 177 177   |
| mCrCIR03C08             | 207 225     | 207 225 | 207 221 | 212 212 | 212 212   | 207 212                   | 225 225   | 221 225 | 225 228 | 225 225 | 225 225  | 225 225 | 207 212  | 207 228 | 212 225   | 207 207   |
| mCrCIR05A05             | 144 163     | 144 163 | 150 163 | 163 163 | 163 163   | 153 163                   | 144 163   | 153 153 | 153 163 | 153 163 | 153 163  | 144 163 | 150 163  | 153 153 | 163 163   | 153 163   |
| Ci01C07                 | 260 262     | 260 262 | 260 280 | 276 280 | 276 280   | 280 298                   | 260 276   | 260 298 | 262 298 | 276 298 | 276 298  | 260 276 | 262 276  | 298 298 | 262 280   | 262 298   |
| mCrCIR07D06             | 179 188     | 179 188 | 179 188 | 166 188 | 166 188   | 166 188                   | 166 188   | 188 197 | 188 197 | 166 195 | 188 197  | 179 188 | 188 195  | 197 197 | 166 188   | 188 197   |
| mCrCIR03G05             | 226 228     | 226 228 | 199 224 | 199 228 | 199 228   | 199 228                   | 228 228   | 224 226 | 226 226 | 228 228 | 199 228  | 228 228 | 199 228  | 226 228 | 199 228   | 226 226   |
| mCrCIR02D04b            | 199 229     | 199 229 | 199 209 | 201 209 | 201 209   | 201 209                   | 209 209   | 229 229 | 199 229 | 209 229 | 201 209  | 199 201 | 209 229  | 201 229 | 209 229   | 199 229   |
| mCrCIR03D12a            | 251 280     | 251 280 | 251 261 | 253 261 | 253 261   | 253 261                   | 261 261   | 280 280 | 251 280 | 261 280 | 253 261  | 251 253 | 261 280  | 253 280 | 261 280   | 251 280   |
| Mest 15                 | 204 210     | 204 210 | 192 204 | 192 192 | 192 192   | 192 201                   | 192 201   | 192 207 | 192 210 | 192 204 | 201 204  | 192 204 | 192 204  | 192 207 | 192 207   | 192 204   |
| Mest 88                 | 111 111     | 111 111 | 130 130 | 100 100 | 100 100   | 117 117                   | 111 111   | 103 103 | 103 111 | 117 117 | 117 117  | 100 111 | 117 117  | 100 103 | 111 111   | 100 111   |
| mCrCIR07E12             | 114 118     | 114 118 | 118 124 | 124 124 | 124 124   | 118 124                   | 118 124   | 118 120 | 114 120 | 118 124 | 118 124  | 114 124 | 118 124  | 118 120 | 118 124   | 118 118   |
| Mest 56                 | 135 139     | 135 139 | 139 141 | 135 135 | 135 135   | 135 147                   | 135 139   | 137 145 | 135 145 | 135 145 | 135 145  | 135 135 | 135 145  | 145 145 | 135 135   | 135 145   |
| mCrCIR02F12             | 122 130     | 122 130 | 122 126 | 122 130 | 122 130   | 122 130                   | 120 130   | 120 130 | 120 130 | 122 130 | 120 130  | 130 130 | 120 130  | 120 130 | 120 122   | 130 130   |
| mCrCIR01C06             | 133 165     | 133 165 | 131 133 | 133 159 | 133 159   | 133 159                   | 131 165   | 131 145 | 159 165 | 133 159 | 133 165  | 133 165 | 133 159  | 131 159 | 131 159   | 131 159   |
| TAA 1                   | 161 164     | 161 164 | 161 161 | 161 164 | 161 164   | 161 164                   | 161 164   | 161 161 | 164 164 | 161 164 | 161 164  | 161 161 | 161 164  | 161 164 | 161 164   | 161 164   |
| Ci07C07                 | 245 258     | 245 258 | 256 258 | 245 245 | 245 245   | 245 245                   | 243 245   | 252 256 | 256 258 | 245 245 | 243 245  | 245 245 | 245 245  | 243 256 | 245 258   | 243 258   |
| Ci02B07                 | 180 188     | 180 188 | 188 188 | 178 182 | 178 182   | 178 182                   | 180 188   | 178 182 | 180 188 | 180 188 | 180 182  | 178 188 | 178 188  | 188 188 | 180 182   | 180 188   |
| mCrCIR02G02             | 116 122     | 116 122 | 112 122 | 112 122 | 112 122   | 112 122                   | 112 122   | 112 124 | 116 122 | 112 122 | 112 112  | 116 122 | 112 122  | 116 122 | 112 122   | 122 140   |
| mCrCIR02G12             | 250 250     | 250 250 | 250 256 | 250 250 | 250 250   | 240 250                   | 250 250   | 244 258 | 250 258 | 250 250 | 250 250  | 250 250 | 240 250  | 240 258 | 248 250   | 240 250   |
| Ci07C09                 | 258 268     | 258 268 | 258 274 | 264 274 | 264 274   | 258 274                   | 258 274   | 258 266 | 268 274 | 258 274 | 258 274  | 258 274 | 258 274  | 258 274 | 258 274   | 258 274   |
| Mest 192                | 222 222     | 222 222 | 222 222 | 202 222 | 202 222   | 222 226                   | 222 232   | 222 240 | 222 240 | 222 222 | 222 232  | 222 222 | 222 232  | 222 240 | 216 226   | 222 240   |
| <b>P(N)<sup>b</sup></b> | 0.00010     | 0.00010 | 0.00031 | 0.00189 | 0.00189   | 0.00037                   | 0.00092   | 0.00017 | 0.00012 | 0.00042 | 0.00023  | 0.00055 | 0.00257  | 0.00107 | 0.00017   | 0.00037   |

Numbers indicate the size in nucleotides of the alleles for each SSR marker.

<sup>a</sup> With all SSR markers that were used, the profiles obtained for the different genotypes of 'sweet orange' were identical and hence we refer to them all with the one generic name.

<sup>b</sup> Probability that a zygotic plant arising from selfing would not be different from the nucellar plants.
